# Supplementary material for: Influence of a multidimensional music-based exercise program on selected cognitive and motor skills in dementia patients—a pilot study
Source: Springer Nature journal article supplement (doi:10.1007/s12662-021-00765-z), 2021-10-15
Supplement: MOESM1 [file 19761782]

# **Influence of a multidimensional music-based exercise program on selected cognitive and motor skills in dementia patients – A Pilot-Study.**

Prinz A.<sup>1</sup>, Schumacher A.<sup>1</sup>, Witte K.<sup>1</sup>

<sup>1</sup> Department of Sport Science, Otto-von-Guericke University Magdeburg, Magdeburg, Germany

---

Corresponding author

---

Alexander Prinz M.Sc.

Zschokkestr. 32

39104 Magdeburg

0391/67-54862

alexander.prinz@ovgu.de

ORCID: 0000-0003-4416-7913

---

## **Author contributions**

All authors contributed to the study conception and design. Material preparation, data collection and analysis were performed by [Prinz A.] and [Schumacher A.]. The first draft of the manuscript was written by [Prinz A.] and all authors commented on previous versions of the manuscript. All authors read and approved the final manuscript.

**Table 1** cognitive test procedures

| <b>cognition</b>                          |                                                    |                                                                                                                                                                                                                                                                                                                                                                         |
|-------------------------------------------|----------------------------------------------------|-------------------------------------------------------------------------------------------------------------------------------------------------------------------------------------------------------------------------------------------------------------------------------------------------------------------------------------------------------------------------|
| <b>CERAD-NP-Plus (Morris et al. 1989)</b> |                                                    |                                                                                                                                                                                                                                                                                                                                                                         |
| <b>Test procedure (subtest)</b>           | <b>Cognitive area</b>                              | <b>Declaration</b>                                                                                                                                                                                                                                                                                                                                                      |
| verbal fluency (animals)                  | Executive functions                                | <ul style="list-style-type: none"> <li>- name as many animals as possible in one minute</li> <li>- Score is unlimited</li> </ul>                                                                                                                                                                                                                                        |
| Boston-Naming-Test                        | Word finding and naming, visual perception         | <ul style="list-style-type: none"> <li>- the short form contains 15 images that would need to be named</li> <li>- 3 groups of items:               <ul style="list-style-type: none"> <li>o first group contains 5 frequent items</li> <li>o the second group contains 5 medium frequent items,</li> <li>o the third group contains 5 rare items</li> </ul> </li> </ul> |
| Mini-Mental State Examination             | General cognitive function level (Screening)       | <ul style="list-style-type: none"> <li>- Answering questions to determine the cognitive abilities of older people</li> <li>- maximum 30 points</li> </ul>                                                                                                                                                                                                               |
| Memory list sum of immediate recall       | Verbal memory                                      | <ul style="list-style-type: none"> <li>- Ten words are read out one after the other and then recalled from memory.</li> <li>- is performed three times, are the same ten terms only in different orders</li> <li>- Number of remembered terms in the three rounds á ten terms (max. 30 points possible)</li> </ul>                                                      |
| Constructional praxis copy                | Visuoconstructive skills                           | <ul style="list-style-type: none"> <li>- 4 pictures have to be painted (circle, parallelogram, 2-square, cube)</li> <li>- maximum 11 points</li> </ul>                                                                                                                                                                                                                  |
| Word list delayed recall                  | Verbal memory (delayed verbal memory)              | <ul style="list-style-type: none"> <li>- free reproduction of the 10 terms from the word list memory test</li> <li>- maximum 10 points</li> </ul>                                                                                                                                                                                                                       |
| Word list Recognition recall              | Verbal memory (delayed verbal memory, recognition) | <ul style="list-style-type: none"> <li>- the 10 already mentioned terms and 10 new terms are presented to the respondent</li> <li>- the respondent has to declare the 10 already mentioned terms as "already known" and the 10 new ones as "not known".</li> </ul>                                                                                                      |

|                                                                                                                                                                                                                                                                                                                                                                                                                                                                                                                                                                                                              |                                           |                                                                                                                                                                                              |
|--------------------------------------------------------------------------------------------------------------------------------------------------------------------------------------------------------------------------------------------------------------------------------------------------------------------------------------------------------------------------------------------------------------------------------------------------------------------------------------------------------------------------------------------------------------------------------------------------------------|-------------------------------------------|----------------------------------------------------------------------------------------------------------------------------------------------------------------------------------------------|
| Constructional praxis recall                                                                                                                                                                                                                                                                                                                                                                                                                                                                                                                                                                                 | Nonverbal memory (delayed figural memory) | <ul style="list-style-type: none"> <li>- Drawing the figures from the constructive part from memory</li> <li>- maximum 11 points</li> </ul>                                                  |
| Trail-Making-Test A                                                                                                                                                                                                                                                                                                                                                                                                                                                                                                                                                                                          | Psychomotor speed, Executive functions    | <ul style="list-style-type: none"> <li>- number linking as fast as possible (from 1-25)</li> <li>- max. 180 s</li> </ul>                                                                     |
| Trail-Making-Test B                                                                                                                                                                                                                                                                                                                                                                                                                                                                                                                                                                                          | Executive functions                       | <ul style="list-style-type: none"> <li>- combine numbers and letters alternately, keeping the numerical and alphabetical sequence, respectively (1-13; A-L)</li> <li>- max. 300 s</li> </ul> |
| <p>Quality criteria:</p> <ul style="list-style-type: none"> <li>- Reliability: Interrater reliability: ICC = 0.92 - 1.00 (American version)</li> <li>- Test-retest reliability: good according to authors</li> <li>-</li> <li>- Validity: <ul style="list-style-type: none"> <li>o Criterion validity: for American version moderate to high correlation with other dementia measures (Ex. R = -.83 Clinical Dementia Rating Scale).</li> <li>o Construct validity: sensitive differentiation between healthy and dementia patients and between the severity of cognitive impairment.</li> </ul> </li> </ul> |                                           |                                                                                                                                                                                              |

**Table 2** motor skills test procedure

| Motor function                                           |                                                                                                                                                                                                                                                                                                                                                                                                                             |                                                                                                                                                                                                                                                           |
|----------------------------------------------------------|-----------------------------------------------------------------------------------------------------------------------------------------------------------------------------------------------------------------------------------------------------------------------------------------------------------------------------------------------------------------------------------------------------------------------------|-----------------------------------------------------------------------------------------------------------------------------------------------------------------------------------------------------------------------------------------------------------|
| Test procedure                                           | Motor area                                                                                                                                                                                                                                                                                                                                                                                                                  | declaration                                                                                                                                                                                                                                               |
| modified Chair-Rising-Test<br><br>(Le Berre et al. 2016) | Strength and coordination of the leg muscles                                                                                                                                                                                                                                                                                                                                                                                | <ul style="list-style-type: none"> <li>- Measures how long it takes a respondent to stand up and sit down five times with hand assistance.</li> <li>- Score from zero (&gt;60s, high risk of falling) to four (&lt;11.2s, low risk of falling)</li> </ul> |
|                                                          | <p>Quality criteria:</p> <ul style="list-style-type: none"> <li>• Reliability: Interrater reliability: ICC = 0.99 - 1.00 <ul style="list-style-type: none"> <li>o Test-retest reliability: ICC = 0.95 - 0.99</li> </ul> </li> <li>• Validity: <ul style="list-style-type: none"> <li>o Construct validity: strong convergences with physical performance (r = -0.59; Incremental Shuttle Walk Test).</li> </ul> </li> </ul> |                                                                                                                                                                                                                                                           |

|                                                                 |                                                                                                                                                                                                                                                                                                                                                                                                                                                         |                                                                                                                                                                                                                                                                                                                                               |
|-----------------------------------------------------------------|---------------------------------------------------------------------------------------------------------------------------------------------------------------------------------------------------------------------------------------------------------------------------------------------------------------------------------------------------------------------------------------------------------------------------------------------------------|-----------------------------------------------------------------------------------------------------------------------------------------------------------------------------------------------------------------------------------------------------------------------------------------------------------------------------------------------|
| Drop bar-Test<br>(Fetz et al. 1978)                             | Elementary (simple) reactivity                                                                                                                                                                                                                                                                                                                                                                                                                          | <ul style="list-style-type: none"> <li>- Response measured how fast the subject can grasp the falling rod (in cm)</li> <li>- subject has three repetitions with the dominant hand</li> <li>- best value goes into the evaluation</li> </ul>                                                                                                   |
|                                                                 | Quality criteria: <ul style="list-style-type: none"> <li>• Objectivity: .83 - .95 (Fetz &amp; Konexl, 1978, p.52); .72 - .91 (Richter &amp; Beuker, 1976).</li> <li>• Reliability: .83 - .91 (Fetz &amp; Konexl, 1978, p.52); .58 (Richter &amp; Beuker, 1976)</li> </ul>                                                                                                                                                                               |                                                                                                                                                                                                                                                                                                                                               |
| Hand Dynamometer<br>(Richards et al. 1996)                      | Hand force (current muscle force)                                                                                                                                                                                                                                                                                                                                                                                                                       | <ul style="list-style-type: none"> <li>- grip strength is measured in both hands (in Newton)</li> <li>- three repetitions are performed with each hand</li> <li>- maximum value is included in the evaluation</li> </ul>                                                                                                                      |
|                                                                 | Quality criteria: <ul style="list-style-type: none"> <li>• Objectivity very high if the exact implementation rules are followed (Oltman, 2012).</li> <li>• Reliability: .89 - .96 (Fetz &amp; Kornexl, 1993)</li> <li>• Content- and construct-related validity is taken as given (Oltmann, 2012)</li> <li>• Criterion-related validity is also taken as given (Oltmann, 2012).</li> </ul>                                                              |                                                                                                                                                                                                                                                                                                                                               |
| Timed-Up-and-Go-Test<br><br>D. Podsiadlo & S. Richardson (1991) | Mobility restriction                                                                                                                                                                                                                                                                                                                                                                                                                                    | <p>The test person is to stand up from a sitting position without assistance, walk back and forth for 3 meters and sit down again (aids are allowed)</p> <p>Score from <math>\leq 10</math>s (Everyday mobility unrestricted) to <math>\geq 30</math> (Pronounced mobility restriction, usually intervention/ Need for assistive devices)</p> |
|                                                                 | Quality criteria: <ul style="list-style-type: none"> <li>• Reliability: Interrater reliability: ICC = 0.91 (Rydwik, 2011)               <ul style="list-style-type: none"> <li>◦ Test-retest reliability: ICC = 0.96 - 0.99 (Flansbierr, 2005)</li> </ul> </li> <li>• Validity:               <ul style="list-style-type: none"> <li>◦ Criterion validity: Berg Balance Scale (r=0.81), Barthel Index (r=0.78) (Podsiadlo, 1991)</li> </ul> </li> </ul> |                                                                                                                                                                                                                                                                                                                                               |

**Table 3** Quality of life

| Quality of life                                                                                                                                                                                                                                                                                                                                                                                                                                                                                                                                                                         |                                |                                                                                                                                                                                                                                                                                                                                                                                                                                                                                                                                                                                              |
|-----------------------------------------------------------------------------------------------------------------------------------------------------------------------------------------------------------------------------------------------------------------------------------------------------------------------------------------------------------------------------------------------------------------------------------------------------------------------------------------------------------------------------------------------------------------------------------------|--------------------------------|----------------------------------------------------------------------------------------------------------------------------------------------------------------------------------------------------------------------------------------------------------------------------------------------------------------------------------------------------------------------------------------------------------------------------------------------------------------------------------------------------------------------------------------------------------------------------------------------|
| Test procedure                                                                                                                                                                                                                                                                                                                                                                                                                                                                                                                                                                          | Area                           | declaration                                                                                                                                                                                                                                                                                                                                                                                                                                                                                                                                                                                  |
| NOSGER II<br>(Spiegel et al. 1991)                                                                                                                                                                                                                                                                                                                                                                                                                                                                                                                                                      | Quality of life<br>(screening) | <ul style="list-style-type: none"> <li>- Questionnaire filled out by the nursing staff (external assessment)</li> <li>- A total of 30 items distributed over the following dimensions: <ul style="list-style-type: none"> <li>o Memory,</li> <li>o Instrumental activities</li> <li>o Activities of daily living</li> <li>o mood</li> <li>o social behavior</li> <li>o disruptive behavior</li> </ul> </li> <li>- Response options from "always" to "never"</li> <li>- low values no or only minor disturbances</li> <li>- high values clear disturbances in the behavioral areas</li> </ul> |
| <p>Quality criteria:</p> <ul style="list-style-type: none"> <li>• Interrater reliability: <math>r = .53 - .89</math></li> <li>• Retest reliability: <math>r = .84 - .92</math> (2 weeks); <math>r = .75 - .93</math> (30 days)</li> <li>• Validity: <ul style="list-style-type: none"> <li>o Criterion validity: varying degrees of correlation with external criteria, depending on the dimension considered (ex. MMSE: <math>r = .32 - .82</math>)</li> <li>o Construct validity: discrimination between healthy and impaired persons with regard to dementia.</li> </ul> </li> </ul> |                                |                                                                                                                                                                                                                                                                                                                                                                                                                                                                                                                                                                                              |
