# Supplementary material for: Influence of a multidimensional music-based exercise program on selected cognitive and motor skills in dementia patients—a pilot study
Source: Springer Nature journal article supplement (doi:10.1007/s12662-021-00765-z), 2021-10-15
Supplement: MOESM2 [file 19761782]

# **Influence of a multidimensional music-based exercise program on selected cognitive and motor skills in dementia patients – A Pilot-Study.**

Prinz A.<sup>1</sup>, Schumacher A.<sup>1</sup>, Witte K.<sup>1</sup>

<sup>1</sup> Department of Sport Science, Otto-von-Guericke University Magdeburg, Magdeburg, Germany

---

Corresponding author

---

Alexander Prinz M.Sc.

Zschokkestr. 32

39104 Magdeburg

0391/67-54862

alexander.prinz@ovgu.de

ORCID: 0000-0003-4416-7913

---

## **Author contributions**

All authors contributed to the study conception and design. Material preparation, data collection and analysis were performed by [Prinz A.] and [Schumacher A.]. The first draft of the manuscript was written by [Prinz A.] and all authors commented on previous versions of the manuscript. All authors read and approved the final manuscript.

**Table 1**

*Results of the additional subtests of the Cerad-NP-Plus test battery.*

| Test procedure                                    | Intervention group<br>n=32                      |                                                  |                                              | Control group<br>n=17                           |                                                  |                                              |
|---------------------------------------------------|-------------------------------------------------|--------------------------------------------------|----------------------------------------------|-------------------------------------------------|--------------------------------------------------|----------------------------------------------|
|                                                   | Pre-Test<br>Median<br>(25th/75th<br>percentile) | Post-Test<br>Median<br>(25th/75th<br>percentile) | Wilcoxon-<br>Test (Z-<br>Value; p-<br>Value) | Pre-Test<br>Median<br>(25th/75th<br>percentile) | Post-Test<br>Median<br>(25th/75th<br>percentile) | Wilcoxon-<br>Test (Z-<br>Value; p-<br>Value) |
| Cognition                                         |                                                 |                                                  |                                              |                                                 |                                                  |                                              |
| Bosten-Naming<br>(max. number)                    | 9.00<br>(6.00/11.75)                            | 9.00<br>(7.00/12.00)                             | Z = -2.928<br>p = .003                       | 10.00<br>(5.00/13.50)                           | 10.00<br>(5.00/12.50)                            | Z = -1.496<br>p = .135                       |
| Constructive practice<br>copy<br>(total points)   | 7.00<br>(4.25/7.00)                             | 7.00<br>(5.00/7.00)                              | Z = -0.605<br>p = .545                       | 6.00<br>(2.50/7.00)                             | 7.00<br>(3.50/8.00)                              | Z = -2.448<br>p = .014                       |
| Constructive practice<br>recall<br>(total points) | 0.00<br>(0.00/0.00)                             | 0.00<br>(0.00/0.00)                              | Z = -1.000<br>p = .317                       | 0.00<br>(0.00/4.50)                             | 0.00<br>(0.00/4.00)                              | Z = -1.473<br>p = .141                       |
| Word list<br>Recognition<br>recall (%)            | 52.50<br>(50.00/85.00)                          | 67.50<br>(50.00/83.75)                           | Z = -1.467<br>p = .142                       | 70.00<br>(50.00/100.00)                         | 75.00<br>(50.00/85.00)                           | Z = -0.973<br>p = .331                       |
| Trail-Making-<br>Test-B (s)                       | 291.00<br>(257.00/373.25)                       | 309.00<br>(261.00/418.00)                        | Z = -1.530<br>p = .126                       | 292.00<br>(142.00/333.25)                       | 325.00<br>(162.25/374.00)                        | Z = -1.826<br>p = .068                       |
